# Supplementary material
Source: PubMed Central journal article supplement (PMC4559498)
Supplement: CJN.00570115_CJN00570115SupplementaryData.pdf [file CJN.00570115_CJN00570115SupplementaryData.pdf]

Donald E. Kohan, MD, PhD,<sup>1</sup> Hiddo J. Lambers Heerspink, PharmD, PhD,<sup>2</sup> Blai Coll, MD, PhD,<sup>3</sup> Dennis Andress, MD,<sup>3</sup> John J. Brennan, PhD,<sup>3</sup> Dalane W. Kitzman, MD,<sup>4</sup> Ricardo Correa-Rotter, MD,<sup>5</sup> Hirofumi Makino, MD, PhD,<sup>6</sup> Vlado Perkovic, MD, PhD,<sup>7</sup> Fan Fan Hou, MD, PhD,<sup>8</sup> Giuseppe Remuzzi, MD,<sup>9</sup> Sheldon W. Tobe, MD,<sup>10</sup> Robert Toto, MD,<sup>11</sup> Hans-Henrik Parving, MD,<sup>12</sup> Dick de Zeeuw, MD, PhD<sup>2</sup>

1. Division of Nephrology, University of Utah Health Sciences Center, Salt Lake City, USA
2. Department of Clinical Pharmacy and Pharmacology, University of Groningen, University Medical Center Groningen, Groningen, The Netherlands
3. Renal Clinical Development, AbbVie, North Chicago, Illinois, USA
4. Wake Forest School of Medicine, Winston Salem, North Carolina, USA
5. National Medical Science and Nutrition Institute Salvador Zubiran, Mexico City, Mexico
6. Okayama University Hospital, Okayama, Japan
7. George Institute for Global Health, University of Sydney, Sydney, Australia
8. Nanfang Hospital, Southern Medical University, Guangzhou, China
9. Mario Negri Institute for Pharmacological Research, Bergamo, Italy
10. Sunnybrook Health Sciences Center, Toronto, Ontario, Canada
11. University of Texas Southwestern Medical Center, Dallas, Texas, USA
12. Department of Medical Endocrinology, Rigshospitalet University Hospital of Copenhagen, Copenhagen, Denmark
